# Supplementary material for: Pharmacological mechanisms of sodium-glucose co-transporter 2 inhibitors in heart failure with preserved ejection fraction
Source: PubMed Central journal article supplement (PMC9188076; doi:10.1186/s12872-022-02693-8), 2022-06-10
Supplement: 12872_2022_2693_MOESM1_ESM.pdf [file 12872_2022_2693_MOESM1_ESM.pdf]

## Additional files

Table S1. Annotations of the PPI network and MCODE components (top3).

| Network              | Annotation | Description                                                               | Log10(P) |
|----------------------|------------|---------------------------------------------------------------------------|----------|
| HFpEF                | GO:0008015 | blood circulation                                                         | -100.0   |
|                      | GO:0003012 | muscle system process                                                     | -100.0   |
|                      | GO:0003013 | circulatory system process                                                | -100.0   |
| SGLT2is              | GO:0016773 | phosphotransferase activity, alcohol group as acceptor                    | -53.4    |
|                      | GO:0016301 | kinase activity                                                           | -53.2    |
|                      | GO:0004672 | protein kinase activity                                                   | -51.9    |
| SGLT2is_MCODE_ALL    | GO:0016773 | phosphotransferase activity, alcohol group as acceptor                    | -36.7    |
|                      | GO:0016301 | kinase activity                                                           | -36.4    |
|                      | GO:0004672 | protein kinase activity                                                   | -34.3    |
| SGLT2is_SUB1_MCODE_1 | GO:0000307 | cyclin-dependent protein kinase holoenzyme complex                        | -16.5    |
|                      | GO:0045859 | regulation of protein kinase activity                                     | -14.6    |
|                      | GO:1902554 | serine/threonine protein kinase complex                                   | -13.8    |
| SGLT2is_SUB1_MCODE_2 | GO:0052695 | cellular glucuronidation                                                  | -19.7    |
|                      | GO:0032787 | monocarboxylic acid metabolic process                                     | -19.7    |
|                      | GO:0006805 | xenobiotic metabolic process                                              | -19.4    |
| SGLT2is_SUB1_MCODE_3 | GO:0004672 | protein kinase activity                                                   | -13.5    |
|                      | GO:0016773 | phosphotransferase activity, alcohol group as acceptor                    | -12.7    |
|                      | GO:0019904 | protein domain specific binding                                           | -12.6    |
| SGLT2is_SUB1_MCODE_4 | GO:0005976 | polysaccharide metabolic process                                          | -10.5    |
|                      | GO:0005977 | glycogen metabolic process                                                | -9.3     |
|                      | GO:0006073 | cellular glucan metabolic process                                         | -9.3     |
| SGLT2is_SUB1_MCODE_5 | GO:0035578 | azurophil granule lumen                                                   | -7.1     |
|                      | GO:0005766 | primary lysosome                                                          | -6.2     |
|                      | GO:0042582 | azurophil granule                                                         | -6.2     |
| SGLT2is_SUB1_MCODE_6 | GO:0001609 | G protein-coupled adenosine receptor activity                             | -10.0    |
|                      | GO:0035588 | G protein-coupled purinergic receptor signaling pathway                   | -8.7     |
|                      | GO:0001973 | G protein-coupled adenosine receptor signaling pathway                    | -8.7     |
| SGLT2is_SUB1_MCODE_7 | GO:0007189 | adenylate cyclase-activating G protein-coupled receptor signaling pathway | -5.9     |
|                      | GO:0007188 | adenylate cyclase-modulating G protein-coupled receptor signaling pathway | -5.3     |

|                       |            |                                                                            |       |
|-----------------------|------------|----------------------------------------------------------------------------|-------|
|                       | GO:0001664 | G protein-coupled receptor binding                                         | -5.0  |
| SGLT2is_SUB1_MCODE_8  | GO:0004558 | alpha-1,4-glucosidase activity                                             | -11.4 |
|                       | GO:0090599 | alpha-glucosidase activity                                                 | -10.7 |
|                       | GO:0015926 | glucosidase activity                                                       | -9.4  |
| SGLT2is_SUB1_MCODE_10 | GO:0035580 | specific granule lumen                                                     | -8.0  |
|                       | GO:0042581 | specific granule                                                           | -6.7  |
|                       | GO:0034774 | secretory granule lumen                                                    | -5.8  |
| SGLT2is_SUB1_MCODE_11 | GO:0006678 | glycosylceramide metabolic process                                         | -11.0 |
|                       | GO:0006677 | glycosylceramide metabolic process                                         | -9.7  |
|                       | GO:0046527 | glycosyltransferase activity                                               | -9.5  |
| _FINAL                | GO:0000302 | response to reactive oxygen species                                        | -29.6 |
|                       | GO:0034599 | cellular response to oxidative stress                                      | -29.2 |
|                       | GO:0062197 | cellular response to chemical stress                                       | -28.9 |
| _FINAL_MCODE_ALL      | GO:0000302 | response to reactive oxygen species                                        | -25.3 |
|                       | GO:0062197 | cellular response to chemical stress                                       | -25.0 |
|                       | GO:0051347 | positive regulation of transferase activity                                | -24.7 |
| _FINAL_SUB1_MCODE_1   | GO:0004672 | protein kinase activity                                                    | -12.7 |
|                       | GO:0016773 | phosphotransferase activity, alcohol group as acceptor                     | -12.0 |
|                       | GO:1901699 | cellular response to nitrogen compound                                     | -11.8 |
| _FINAL_SUB1_MCODE_2   | GO:0051896 | regulation of protein kinase B signaling                                   | -11.2 |
|                       | GO:0043491 | protein kinase B signaling                                                 | -10.9 |
|                       | GO:0051897 | positive regulation of protein kinase B signaling                          | -10.1 |
| _FINAL_SUB1_MCODE_3   | GO:0018105 | peptidyl-serine phosphorylation                                            | -10.3 |
|                       | GO:0032147 | activation of protein kinase activity                                      | -10.2 |
|                       | GO:0018209 | peptidyl-serine modification                                               | -10.1 |
| _FINAL_SUB1_MCODE_4   | GO:0035987 | endodermal cell differentiation                                            | -7.4  |
|                       | GO:0030574 | collagen catabolic process                                                 | -7.4  |
|                       | GO:0001706 | endoderm formation                                                         | -7.2  |
| _FINAL_SUB1_MCODE_5   | GO:0050839 | cell adhesion molecule binding                                             | -6.2  |
|                       | GO:0005178 | integrin binding                                                           | -5.9  |
|                       | GO:1903039 | positive regulation of leukocyte cell-cell adhesion                        | -5.3  |
| _FINAL_SUB1_MCODE_6   | GO:0002719 | negative regulation of cytokine production involved in immune response     | -8.6  |
|                       | GO:0002701 | negative regulation of production of molecular mediator of immune response | -8.0  |
|                       | GO:1902895 | positive regulation of pri-miRNA transcription by RNA polymerase II        | -8.0  |
| _FINAL_SUB1_MCODE_7   | GO:0000307 | cyclin-dependent protein kinase holoenzyme complex                         | -8.5  |
|                       | GO:0016538 | cyclin-dependent protein serine/threonine kinase                           | -8.3  |

|                     |            |                                         |      |
|---------------------|------------|-----------------------------------------|------|
|                     |            | regulator activity                      |      |
|                     | GO:1902554 | serine/threonine protein kinase complex | -7.5 |
| _FINAL_SUB1_MCODE_8 | GO:0035578 | azurophil granule lumen                 | -7.5 |
|                     | GO:0005766 | primary lysosome                        | -6.8 |
|                     | GO:0042582 | azurophil granule                       | -6.8 |

Table S2. Summary of enrichment analysis in PaGenBase.

| GO        | Description                               | _LogP_HFpEF | _LogP_SGLT2is |
|-----------|-------------------------------------------|-------------|---------------|
| PGB:00002 | Cell-specific: HEPG2                      | -13.925     | -5.73526      |
| PGB:00049 | Cell-specific: Adipocyte                  | -10.9623    | -5.14538      |
| PGB:00001 | Tissue-specific: liver                    | -17.6753    | -9.00093      |
| PGB:00004 | Tissue-specific: kidney                   | -4.94603    | -7.71121      |
| PGB:00045 | Tissue-specific: placenta                 | -15.5053    | -2.17974      |
| PGB:00031 | Cell-specific: HUVEC                      | -11.7767    | -2.67481      |
| PGB:00018 | Tissue-specific: lung                     | -12.61      | -3.71064      |
| PGB:00078 | Cell-specific: liver cell                 | -9.84714    | -2.8477       |
| PGB:00011 | Tissue-specific: spleen                   | -7.37918    | -2.68737      |
| PGB:00081 | Cell-specific: Bronchial Epithelial Cells | -6.27748    | -2.80705      |
| PGB:00015 | Tissue-specific: Smooth Muscle            | -16.266     | 0             |
| PGB:00120 | Cell-specific: Cardiac Myocytes           | -14.1338    | 0             |
| PGB:00047 | Cell-specific: THY <sup>+</sup>           | -12.6346    | 0             |
| PGB:00014 | Cell-specific: DRG                        | -10.6015    | 0             |
| PGB:00037 | Tissue-specific: heart                    | -22.8523    | 0             |
| PGB:00041 | Tissue-specific: Blood                    | -6.64036    | 0             |
| PGB:00060 | Tissue-specific: retinoblastoma           | -7.03765    | 0             |
| PGB:00069 | Cell-specific: A204                       | -8.6486     | 0             |
| PGB:00044 | Tissue-specific: skeletal muscle          | -6.62014    | 0             |
| PGB:00115 | Cell-specific: CD33 <sup>+</sup> Myeloid  | -5.30947    | 0             |

Empagliflozin

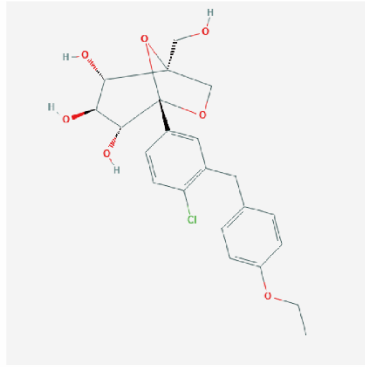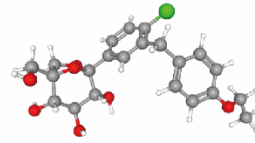

Dapagliflozin

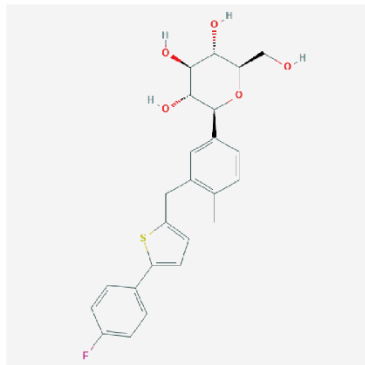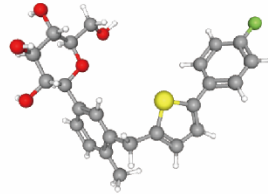

Canagliflozin

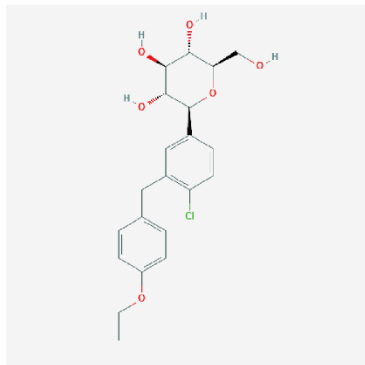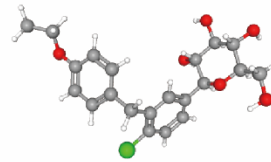

Ertugliflozin

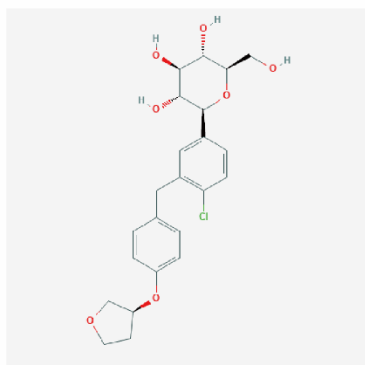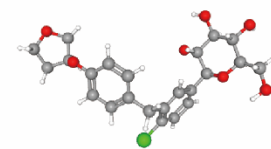

Figure S1. The structures of four SGLT2is.

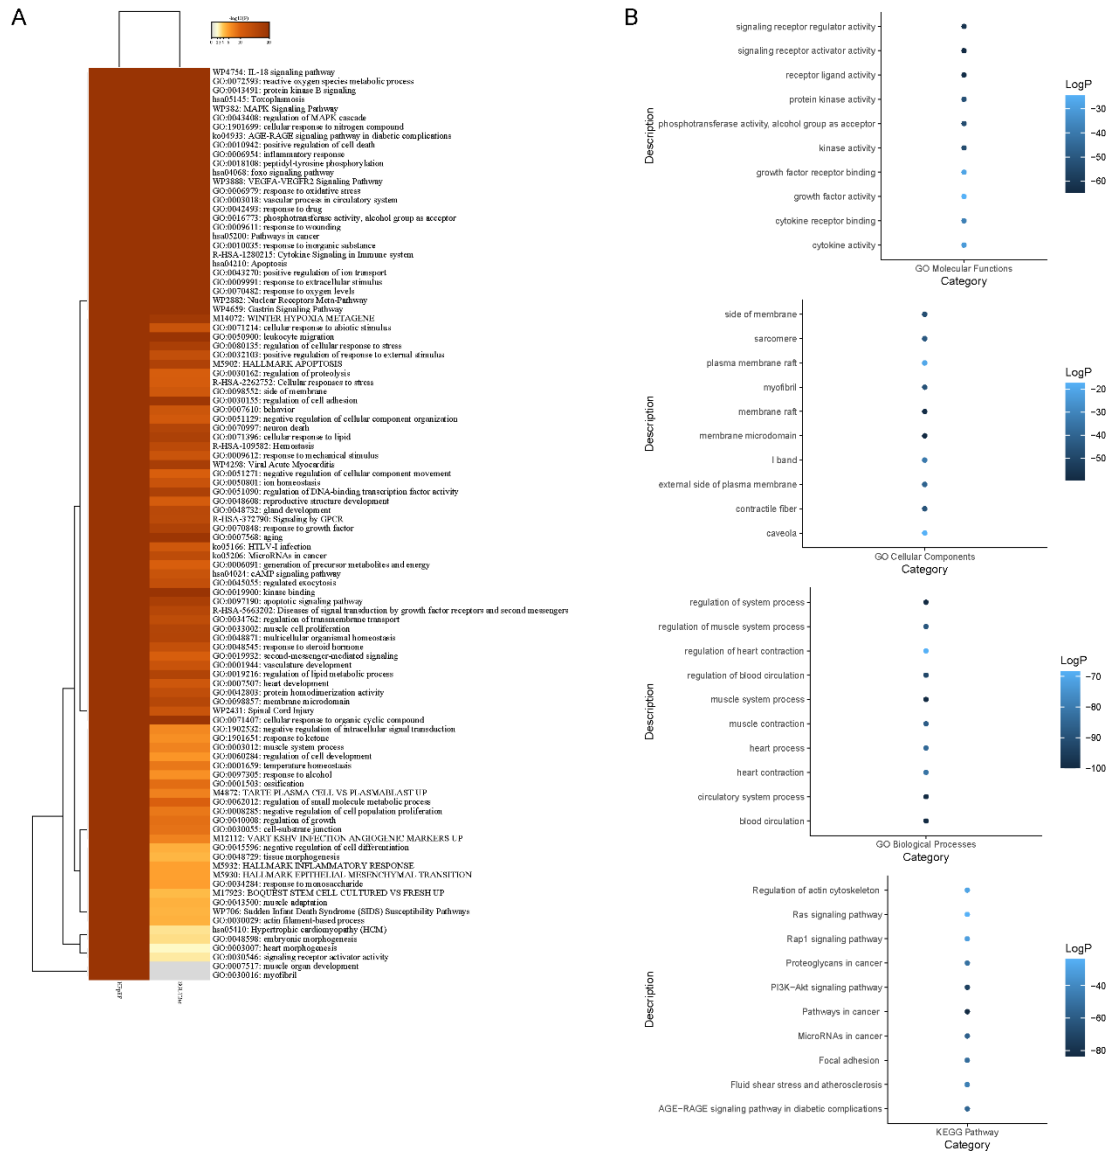

Figure S2. Functional enrichment analysis. A. Heatmap of enriched terms across targets, colored by  $P$ -values (top 100).  $P$ -values were calculated based on the accumulative hypergeometric distribution. B. Bubble chart of GO molecular functions, GO cellular components, GO biological processes, and KEGG analysis, colored by  $P$ -values (top 10).

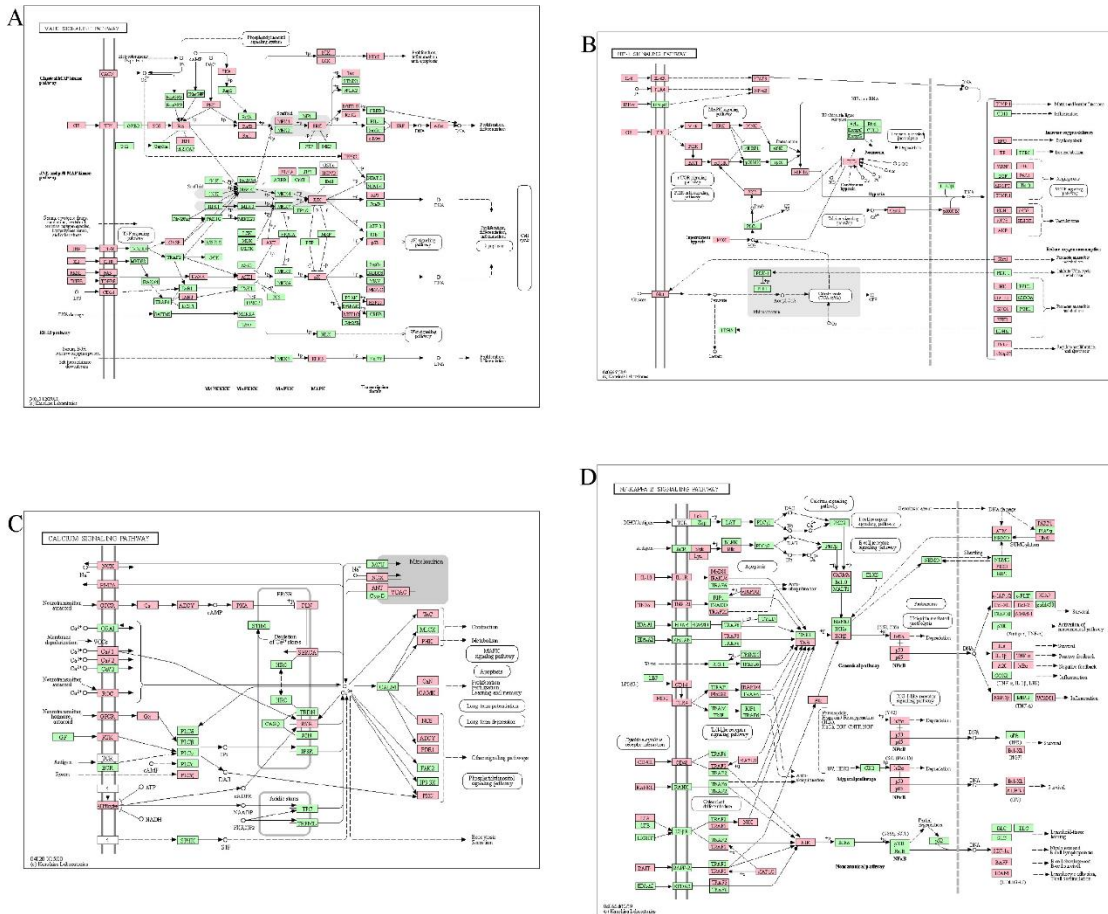

Figure S3. KEGG pathway maps. A. MAPK signaling pathway. B. HIF-1 signaling pathway. C. Calcium signaling pathway. D. NF-kappa B signaling pathway. The pink pentagams indicate the targets.

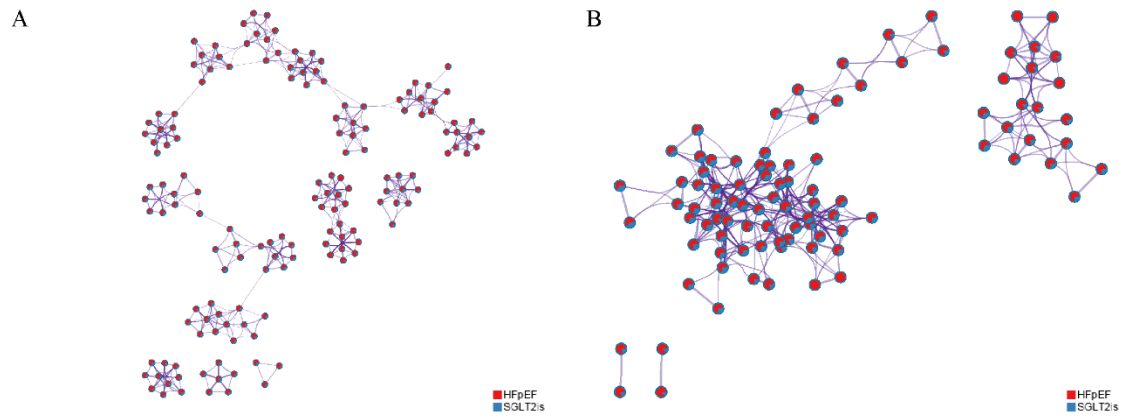

Figure S4. Network of enriched terms represented as pie charts. A. GO. B. KEGG. The pie charts are color-coded based on the gene list identities, where the size of a slice represents the percentage of genes under the term that originated from the corresponding gene list.



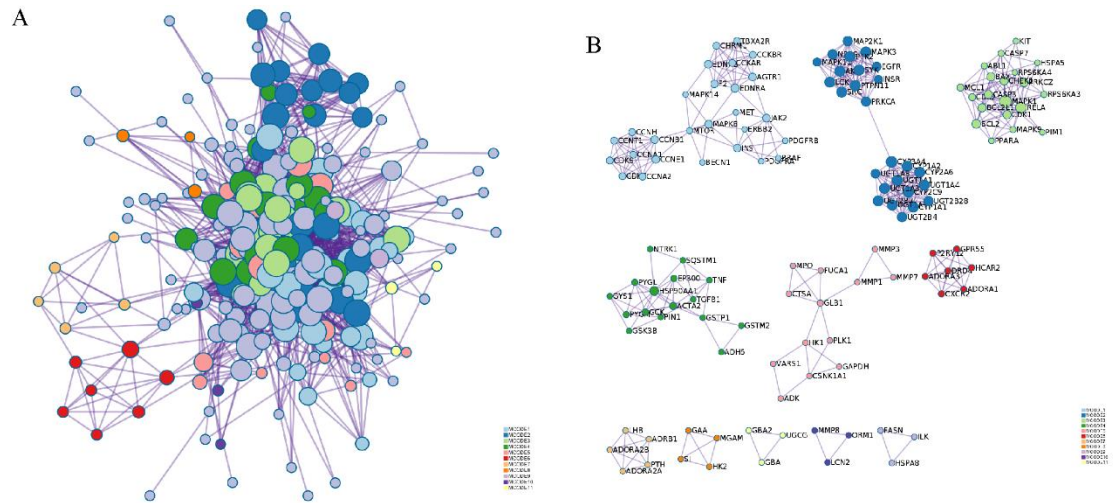

Figure S5. PPI network of SGLT2is and its MCODE components. A. PPI network, where terms containing different colors tend to have different MCODE components. B. The 11 most significant MCODE components form the PPI network.

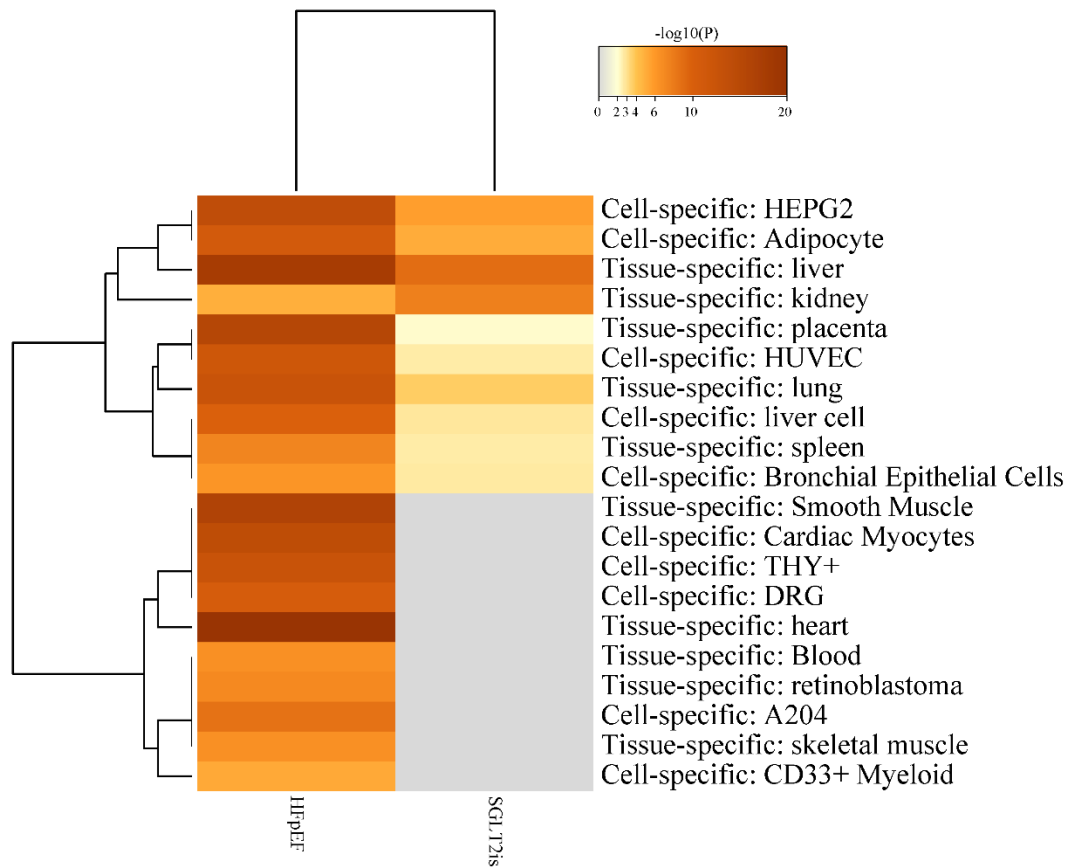

Figure S6. Summary of enrichment analysis in PaGenBase. *P*-values were calculated based on the accumulative hypergeometric distribution.

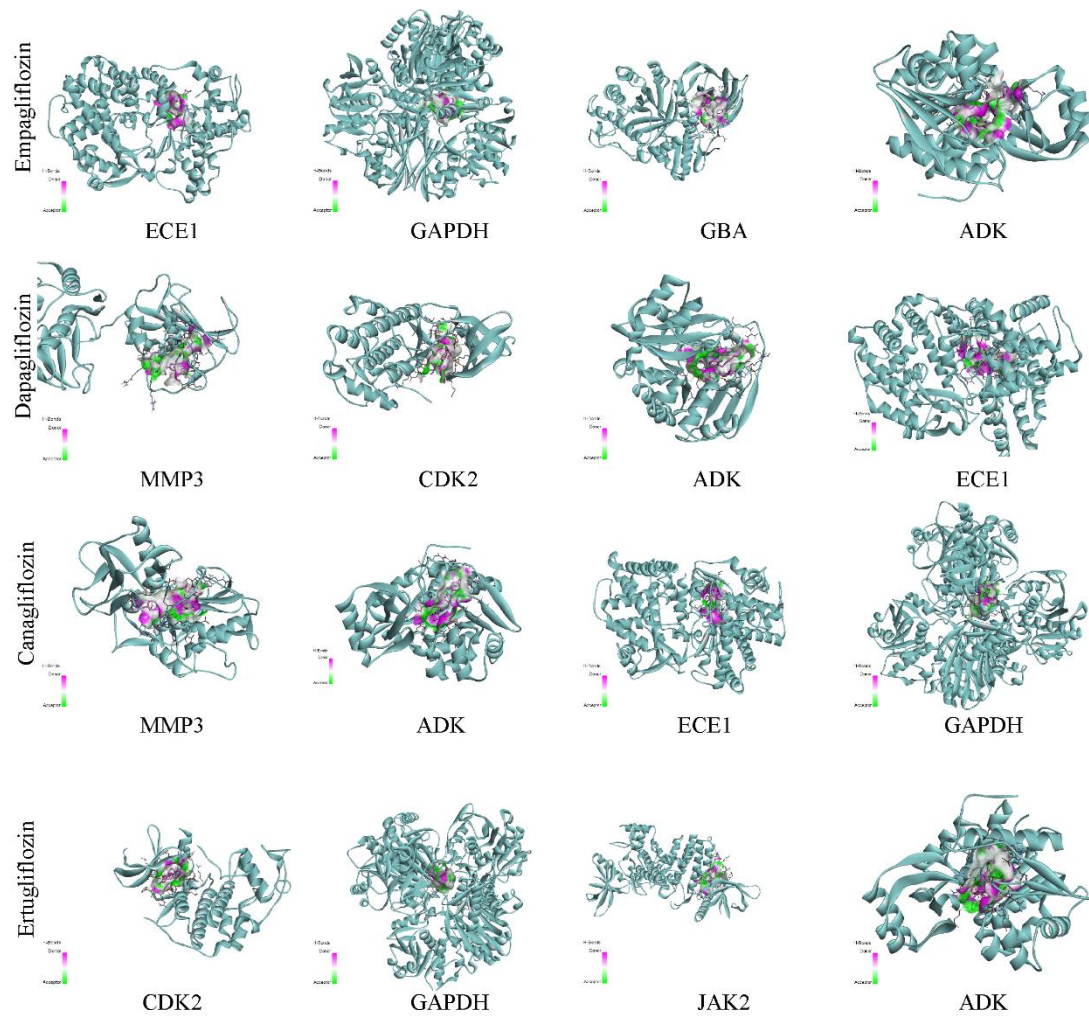

Figure S7. Whole docking mode between SGLT2is and 4 key targets with the lowest binding energies.
